# Supplementary material for: Threshold heterogeneity of perioperative hemoglobin drop for acute kidney injury after noncardiac surgery: a propensity score weighting analysis
Source: Springer Nature journal article supplement (doi:10.1186/s12882-022-02834-3), 2022-06-11

**Crude Model**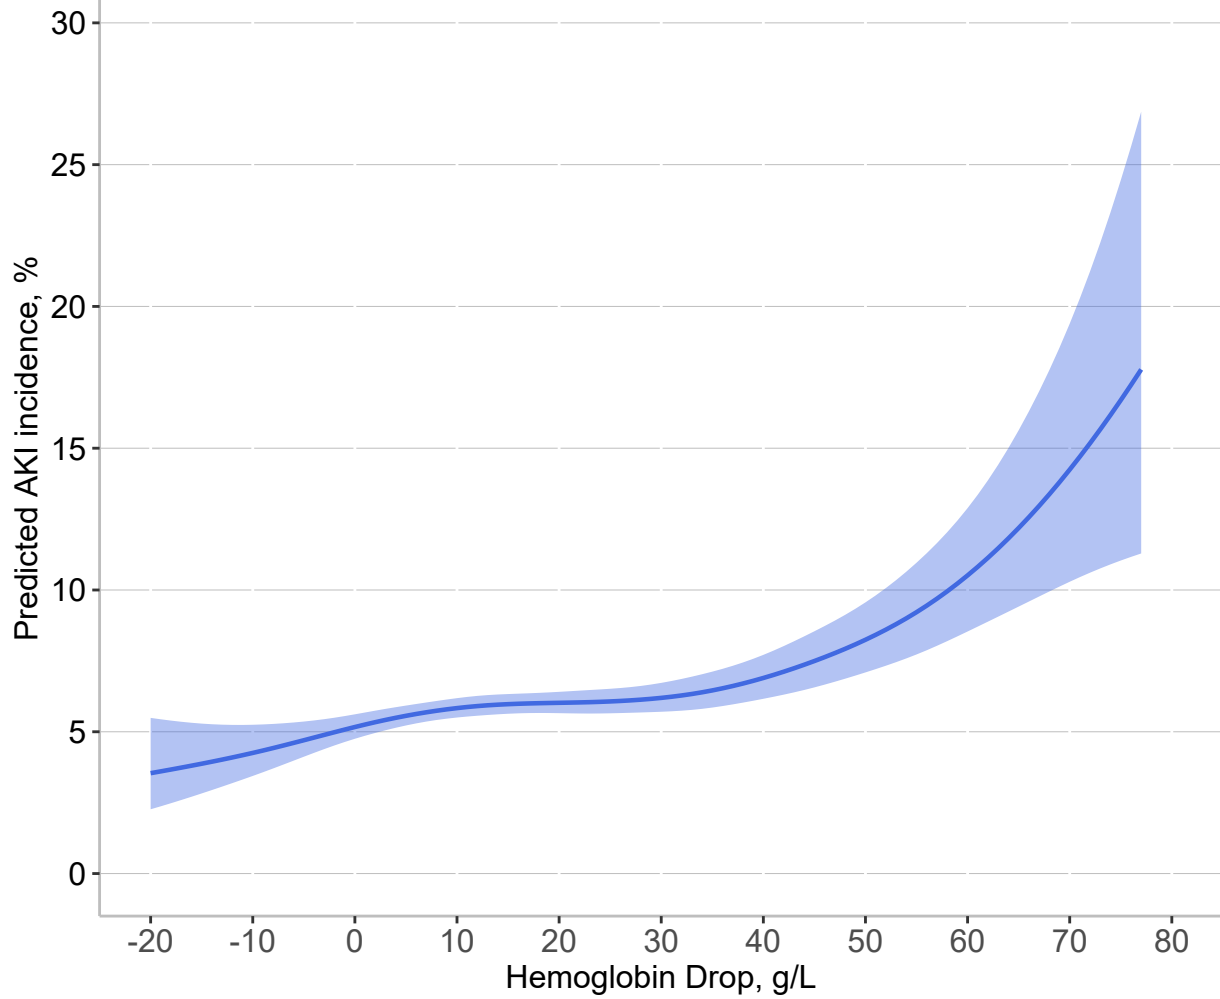**Adjusted Model**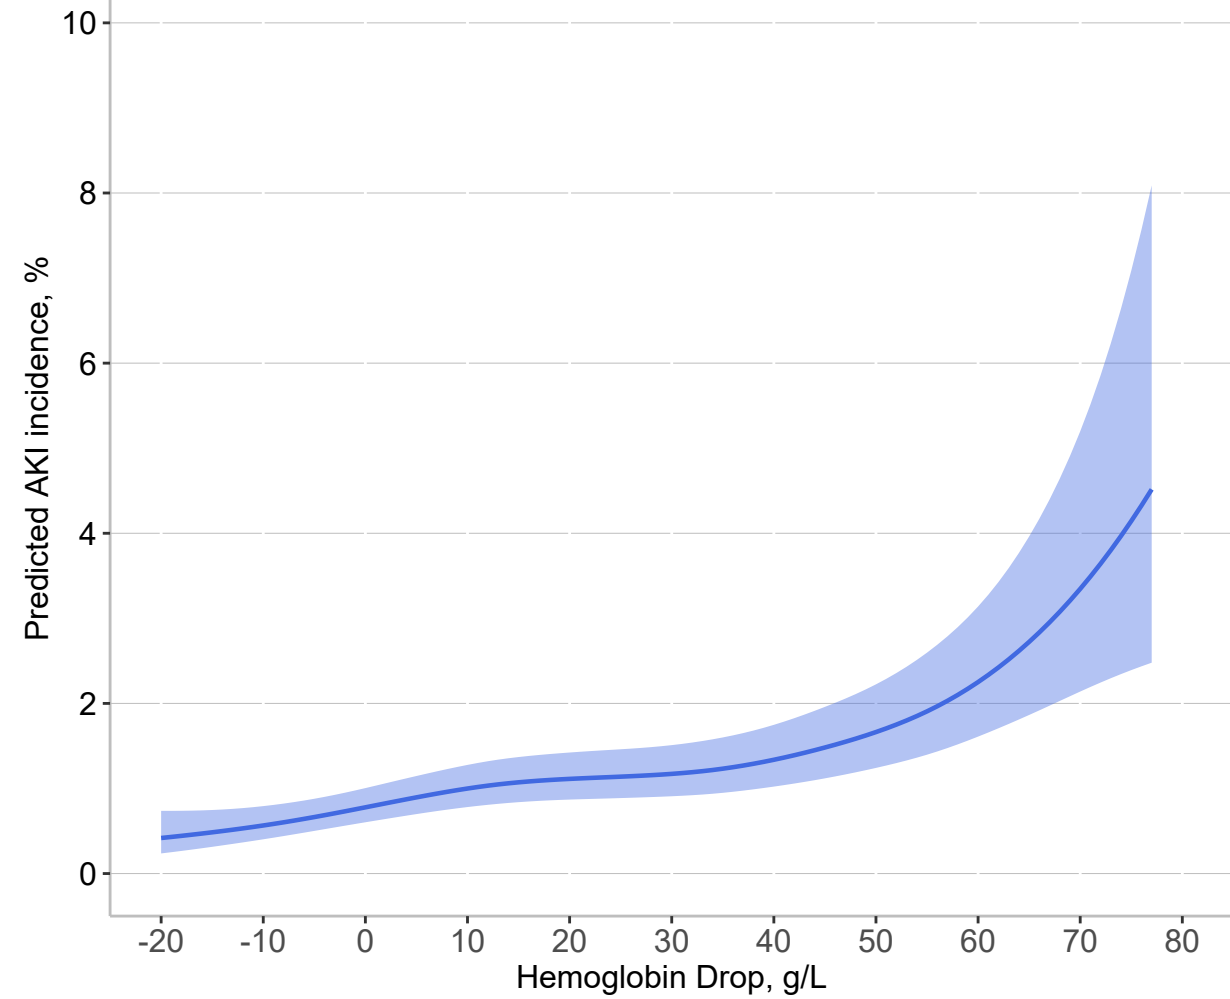

Supplement: MOESM2 [file 23152282]
